# Supplementary material for: [18F]FDG-PET accurately identifies pathological response early upon neoadjuvant immune checkpoint blockade in head and neck squamous cell carcinoma
Source: Springer Nature journal article supplement (doi:10.1007/s00259-021-05610-x), 2021-12-27

a.

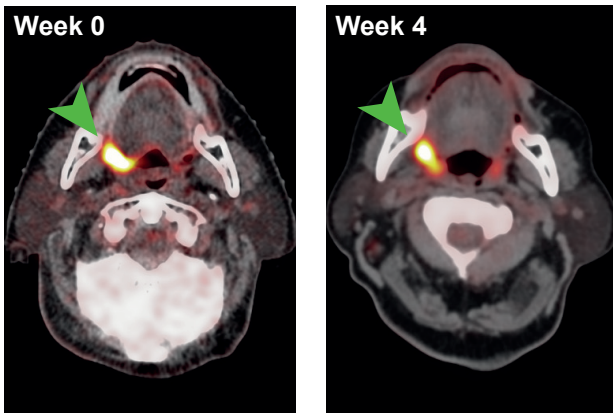

b.

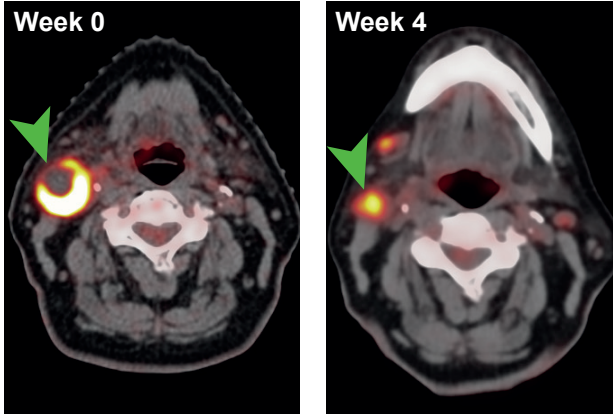

Supplement: MOESM1 [file 19976252]
